# Supplementary material
Source: HighWire-hosted journal article supplement (https://jnis.bmj.com/content/neurintsurg-2020-015877)
Supplement: inline-supplementary-material-1 [file inline-supplementary-material-1.pdf]

**Supplementary table 1. Endoluminal flow diverters**

|                             | Device             | Regulation          | Composition                                                   | Deployment                          | Size                                 | MC & porosity         | Delivery catheter | Clinical evidence                                                                                                                                                                                                                                                                                                                                                                                                                                                                              |
|-----------------------------|--------------------|---------------------|---------------------------------------------------------------|-------------------------------------|--------------------------------------|-----------------------|-------------------|------------------------------------------------------------------------------------------------------------------------------------------------------------------------------------------------------------------------------------------------------------------------------------------------------------------------------------------------------------------------------------------------------------------------------------------------------------------------------------------------|
| <b>Pipeline (Medtronic)</b> | PED                | CE 2008<br>FDA 2011 | 48 wires<br>Cobalt-chromium/<br>platinum-tungsten             | Push & unsheathe<br>Non-resheatable | Diameter 2.5-5 mm<br>Length 10-35 mm | MC 30-35%<br>P 65-70% | 0.027"            | 1. Nelson:[22] (PITA) Mostly unruptured ICA aneurysms, FU 6-mo, CAO 93.3%, MB 6.5%, MT 0<br>2. Beckske:[23] (PUFS) Unruptured large/giant ICA aneurysms, FU 6-mo, 12-mo, 3-yr, 5-yr, CAO 73.6% (6-mo), 86.8% (12-mo), 93.4% (3-yr), 95.2% (5-yr), MB 5.6% (6-mo), MT 2.8 (6-mo)<br>3. Kallmes:[25] (IntrePED) Mostly unruptured ICA aneurysms, FU median 19.3-mo, MB 7.4%, MT 3.8%<br>4. Kallmes:[26] (ASPIRe) Mostly unruptured ICA aneurysms, FU median 7.8-mo, CAO: 74.8%, MB 5.2%, MT 1.6% |
|                             | Pipeline Flex      | CE 2014<br>FDA 2015 | 48 wires<br>Cobalt-chromium/<br>platinum-tungsten             | Push & unsheathe<br>Resheathable    | Diameter 2.5-5 mm<br>Length 10-35 mm | MC 30-35%<br>P 65-70% | 0.027"            | 1. Brasiliense:[27] Mostly unruptured ICA aneurysms, FU mean 4.8-mo, CAO 52.1%, MB 1.9% (30-d), MT 0.5% (30-d)<br>3. Hanel:[28] (PREMIER) Mostly unruptured ICA aneurysms, FU 1-yr, CAO 81.9%, MB 2.1%, MT 0.7%                                                                                                                                                                                                                                                                                |
|                             | Pipeline Shield    | CE 2015             | 48 wires<br>Cobalt-chromium/<br>platinum-tungsten<br>PC coat  | Push & unsheathe<br>Resheathable    | Diameter 2.5-5 mm<br>Length 10-35 mm | MC 30-35%<br>P 65-70% | 0.027"            | 1. Rice:[30] Mostly unruptured ICA aneurysms, FU 1-yr, CAO 77.2%, MB 2.0%, MB 6.4%, MT 1.0%<br>2. Trivelato:[31] Mostly unruptured ICA aneurysms, FU 1-yr, CAO 85.3%, MB 6%, MT 0.7%<br>3. Manning:[58] Acutely ruptured mostly anterior aneurysms with SAPT. Mostly anterior circulation, FU 7-d after SAH, complete/near-complete aneurysm occlusion 85.7%, MB 7.1%, MT 7.1%                                                                                                                 |
| <b>Surpass (Stryker)</b>    | Surpass Streamline | CE 2010<br>FDA 2018 | 48, 72, and 96 wires<br>Cobalt-chromium/<br>platinum-tungsten | Pusher<br>Resheathable              | Diameter 2-5 mm<br>Length 12-50 mm   | MC 30%<br>P 70%       | 0.040"            | 1. Meyers:[34] (SCENT) Mostly unruptured ICA aneurysms, FU 12-mo, CAO 66.1%, MB 8.3%, MT 2.8%                                                                                                                                                                                                                                                                                                                                                                                                  |
|                             | Surpass Evolve     | CE 2019<br>FDA 2020 | 48 and 64 wires<br>Cobalt-chromium/<br>platinum-tungsten      | Pusher<br>Resheathable              | Diameter 2.5-5 mm<br>Length 12-40 mm | MC 30%<br>P 70%       | 0.027"            | 1. Orru:[35] Mostly unruptured ICA aneurysms, FU median 4-mo, CAO 57%, MB 4%, MT 0                                                                                                                                                                                                                                                                                                                                                                                                             |

**CAO, complete aneurysm occlusion; CE, Conformité Européenne (European Conformity); FDA, Food and Drug Administration; FU, follow-up; ICA, internal carotid artery; MB, morbidity; MC, metal coverage; MT, mortality; PC, phosphorylcholine; PED, Pipeline Embolization Device; SAPT, single antiplatelet therapy**

**Supplementary table 1. Endoluminal flow diverters**

|                              | Device          | Regulation          | Composition                                                                             | Deployment                            | Size                                         | MC & porosity         | Delivery catheter      | Clinical evidence                                                                                                                                                                                                         |
|------------------------------|-----------------|---------------------|-----------------------------------------------------------------------------------------|---------------------------------------|----------------------------------------------|-----------------------|------------------------|---------------------------------------------------------------------------------------------------------------------------------------------------------------------------------------------------------------------------|
| <b>FRED (Micro-Ventio)</b>   | FRED            | CE 2012<br>FDA 2019 | 48 wires (inner layer)<br>16 wires (outer layer)<br>Nitinol                             | Push & pull<br>Resheatable            | Diameter<br>3.5-5 mm<br>Length<br>13-45 mm   | MC 35-40%             | 0.027"                 | 1. Killer-Oberpfalzer:[36] (EuFRED) Mostly unruptured anterior circulation aneurysms, FU>1-yr, CAO 95.3%, MB 0.8%, MT 1.5%<br>2. Pierot:[37] (SAFE) Mostly unruptured ICA aneurysms, FU 1-yr, CAO 73.3%, MB 2.9%, MT 1.9% |
|                              | FRED Jr         | CE Mark             | 36 wires (inner layer)<br>16 wires (outer layer)<br>Nitinol                             | Push & pull<br>Resheathable           | Diameter<br>2.5-3 mm<br>Length<br>13-41 mm   | MC 30%                | 0.021"                 | 1. Mohlenbruch:[38] Small vessel aneurysms, FU 12-mo, CAO 73%, MB 2.4%, MT 0%                                                                                                                                             |
| <b>Silk (Balt Extrusion)</b> | Silk            | CE 2008             | 48 wires<br>Nitinol/<br>platinum                                                        | Push & pull<br>Resheathable           | Diameter<br>2-5 mm<br>Length<br>15-40 mm     | MC 35-55%<br>P 45-60% | 0.021"                 | 1. Pumar:[39] Mostly unruptured ICA aneurysms, FU 1-yr, CAO 78.1%, MB 9.6% (6-mo), MT 3.2% (6-mo)<br>2. Foa Torres:[41] Mostly unruptured ICA aneurysms, FU 1-yr, CAO 93.9%, MB 4.2%, MT 2.1%                             |
|                              | Silk+           | CE 2012             | 48 wires<br>Nitinol/<br>platinum                                                        | Push & pull<br>Resheathable           | Diameter<br>2-6 mm<br>Length<br>10-40 mm     | MC 35-55%<br>P 45-60% | 0.021 and<br>0.025"    | 1. Lubicz:[42] (Mixed Silk and Silk+) Mostly small anterior circulation aneurysms, FU mean 22-mo, CAO 73%, MB 5.5%, MT 0                                                                                                  |
|                              | Silk Vista Baby | CE 2018             | 48 wires<br>Nitinol/<br>platinum<br>DFT tech                                            | Push & pull<br>Resheathable           | Diameter<br>2-3 mm<br>Length<br>10.5-26.5 mm | -                     | 0.017"                 | 1. Martinez-Galdamez:[43] Small vessel aneurysms, FU none, CAO 18.6% (intraoperative), 5 intraprocedural complications, MT 0<br>2. Schob:[44] Aneurysms beyond Circle of Willis, FU 2.7-mo, CAO 68%, MB 0, MT 0           |
| <b>p64 p48MW (Phenox)</b>    | p64             | CE 2012             | 64 wires<br>Nitinol                                                                     | Mechanical detachment<br>Resheathable | Diameter<br>2.5-5 mm<br>Length<br>12-36 mm   | MC 35-49%<br>P 51-60% | 0.027"                 | 1. Briganti:[45] Mostly unruptured ICA aneurysms, FU median 16-mo, CAO 88%, MB 2.5%, MT 0<br>2. Morais:[46] Mostly unruptured anterior circulation aneurysms, FU 12-mo, CAO 85.7%, MB 0, MT 0                             |
|                              | p48MW           | CE Mark             | 48 wires<br>Nitinol/<br>platinum<br>Movable wire (MW) for vessel protection<br>DFT tech | Push & pull<br>Resheathable           | Diameter<br>2-3 mm<br>Length<br>9-25 mm      | -                     | 0.021"<br>(p48,0.017") | 1. Bhogal:[47] Mostly unruptured anterior circulation aneurysms, FU mean 13.1-mo, CAO 70%, MB 4%, MT 4%                                                                                                                   |

**CAO, complete aneurysm occlusion; CE, Conformité Européenne (European Conformity); DFT, drawn filled tubing; FDA, Food and Drug Administration; FRED, Flow Re-Direction Endoluminal Device; FU, follow-up; ICA, internal carotid artery; MB, morbidity; MC, metal coverage; MT, mortality**

**Supplementary table 1. Endoluminal flow diverters**

| Device                                                  | Regulation                                        | Composition                                             | Deployment                               | Size                                       | MC & porosity         | Delivery catheter | Clinical evidence                                                                                                                                                                                                                                                                                                                            |
|---------------------------------------------------------|---------------------------------------------------|---------------------------------------------------------|------------------------------------------|--------------------------------------------|-----------------------|-------------------|----------------------------------------------------------------------------------------------------------------------------------------------------------------------------------------------------------------------------------------------------------------------------------------------------------------------------------------------|
| p48_HPC                                                 | CE Mark                                           | 48 wires<br>Nitinol/<br>platinum<br>HPC coating         | Push & pull<br>Resheatable               | Diameter<br>2-3 mm<br>Length<br>9-25 mm    | -                     | 0.021"            | 1. Bhogal:[49] Unruptured mostly anterior circulation aneurysms with SAPT, FU 3-mo, CAO 50%, 1 patient with postprocedural rupture of aneurysm, MT 0<br>2. Aguilar-Perez:[59] Acutely ruptured anterior and posterior circulation aneurysms with SAPT, FU mean 6-mo, CAO 83%, 3 patients with postprocedural thromboembolic events, 2 deaths |
| <b>Derivo<br/>(Acandis<br/>GmbH)</b>                    | Derivo (2 <sup>nd</sup><br>generation)<br>CE Mark | 48 wires<br>Nitinol/<br>platinum<br>BlueXide<br>coating | Mechanical<br>detachment<br>Resheathable | Diameter<br>3.5-6 mm<br>Length<br>15-50 mm | MC 35-38%<br>P 62-65% | 0.027"            | 1. Trivelato:[51] (BRAIDED) Mostly unruptured anterior circulation aneurysms, FU 1-yr, CAO 89.2%, MB 5.5%, MT 1.4%<br>2. Goertz:[50] Acutely ruptured mostly ICA aneurysms, FU median 223-d, CAO 90%, MB 10%, MT 0                                                                                                                           |
| <b>Tubridge<br/>(MicroPort<br/>Medical<br/>Company)</b> | Tubridge<br>NMPA<br>2018                          | 48 and 64<br>wires<br>Nitinol                           | Push & pull<br>Resheathable              | Diameter<br>2.5-5 mm<br>Length<br>10-45 mm | MC 30-35%<br>P 65-70% | 0.029"            | 1. Zhou:[52] Unruptured large/giant ICA aneurysms, FU 9.9-mo, CAO 72%, MB 0, MT 0                                                                                                                                                                                                                                                            |

**CAO, complete aneurysm occlusion; CE, Conformité Européenne (European Conformity); FU, follow-up; HPC, hydrophilic polymer coating; ICA, internal carotid artery; MB, morbidity; MC, metal coverage; MT, mortality; NMPA, National Medical Products Administration; SAPT, single antiplatelet therapy**
